# Supplementary material for: When, why and how tumour clonal diversity predicts survival
Source: PubMed Central journal article supplement (PMC7428820; doi:10.1111/eva.13057), 2020-07-18

Deme size = 64

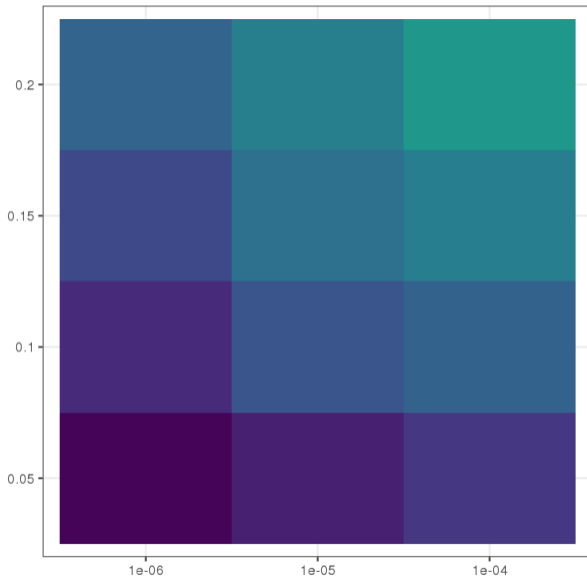

Deme size = 512

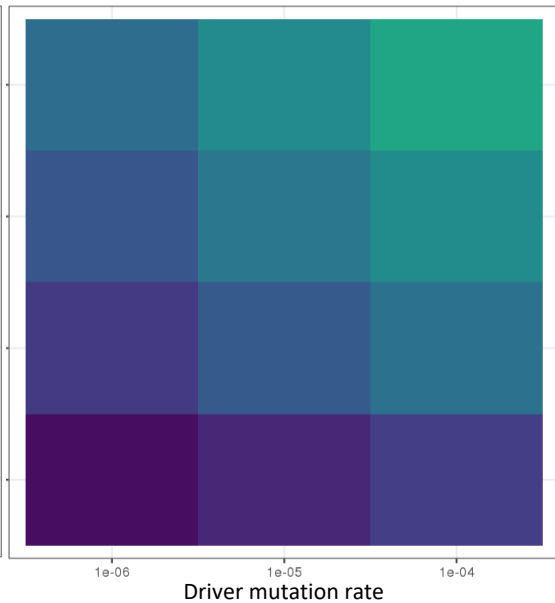

Deme size = 4096

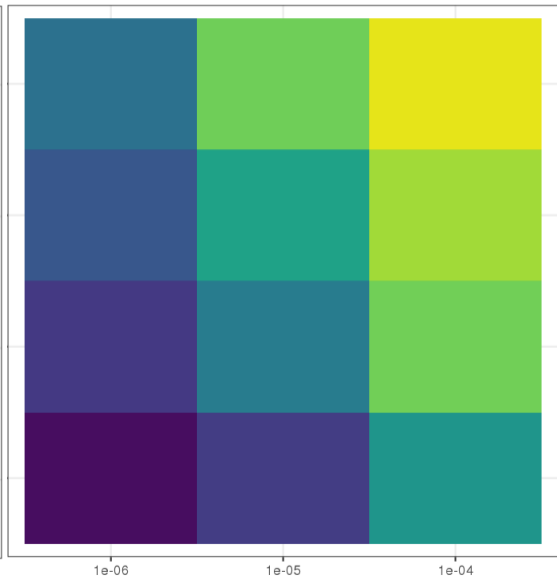

Median clonal turnover

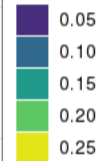

Supplement: EVA-13-1558-s002.pdf [file EVA-13-1558-s002.pdf]
