# Supplementary material for: When, why and how tumour clonal diversity predicts survival
Source: PubMed Central journal article supplement (PMC7428820; doi:10.1111/eva.13057), 2020-07-18

correlation coefficient:  
clonal diversity vs mean cell division rate

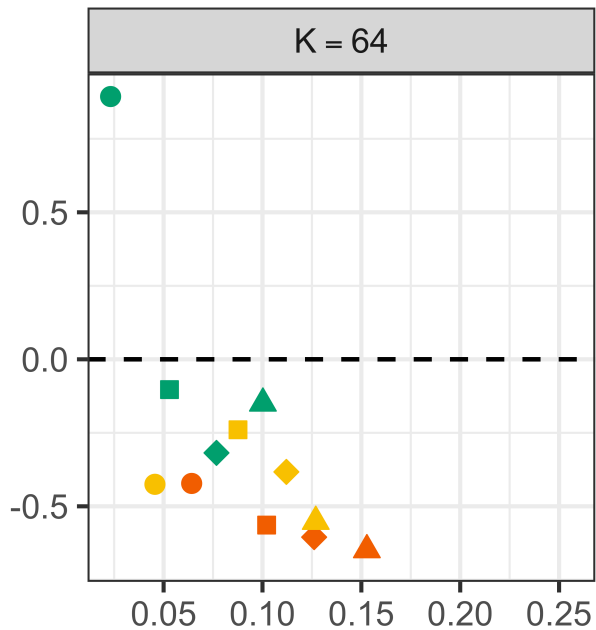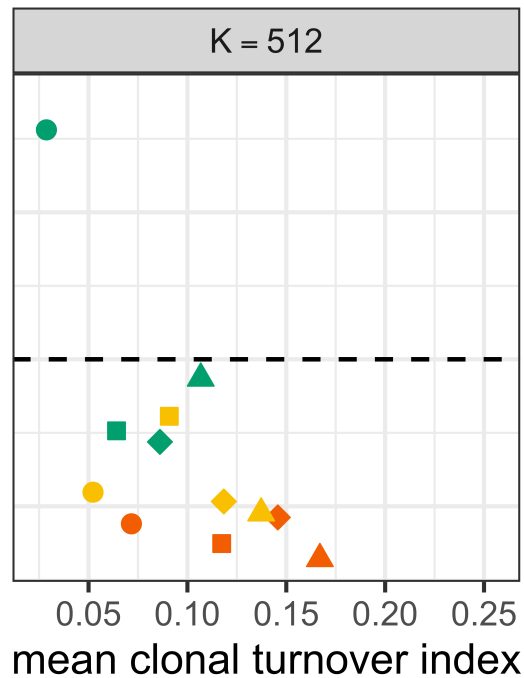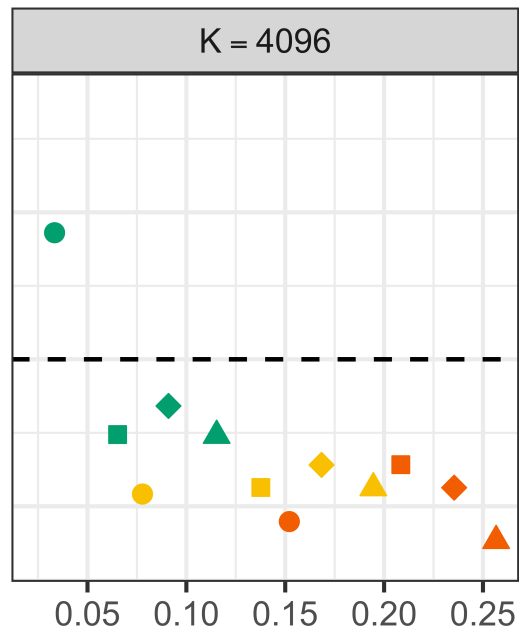

Driver mutation rate

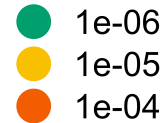

Mean driver fitness effect

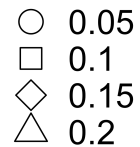

Supplement: EVA-13-1558-s003.pdf [file EVA-13-1558-s003.pdf]
