# Supplementary material for: When, why and how tumour clonal diversity predicts survival
Source: PubMed Central journal article supplement (PMC7428820; doi:10.1111/eva.13057), 2020-07-18

correlation coefficient:  
predictor variables vs average growth rate

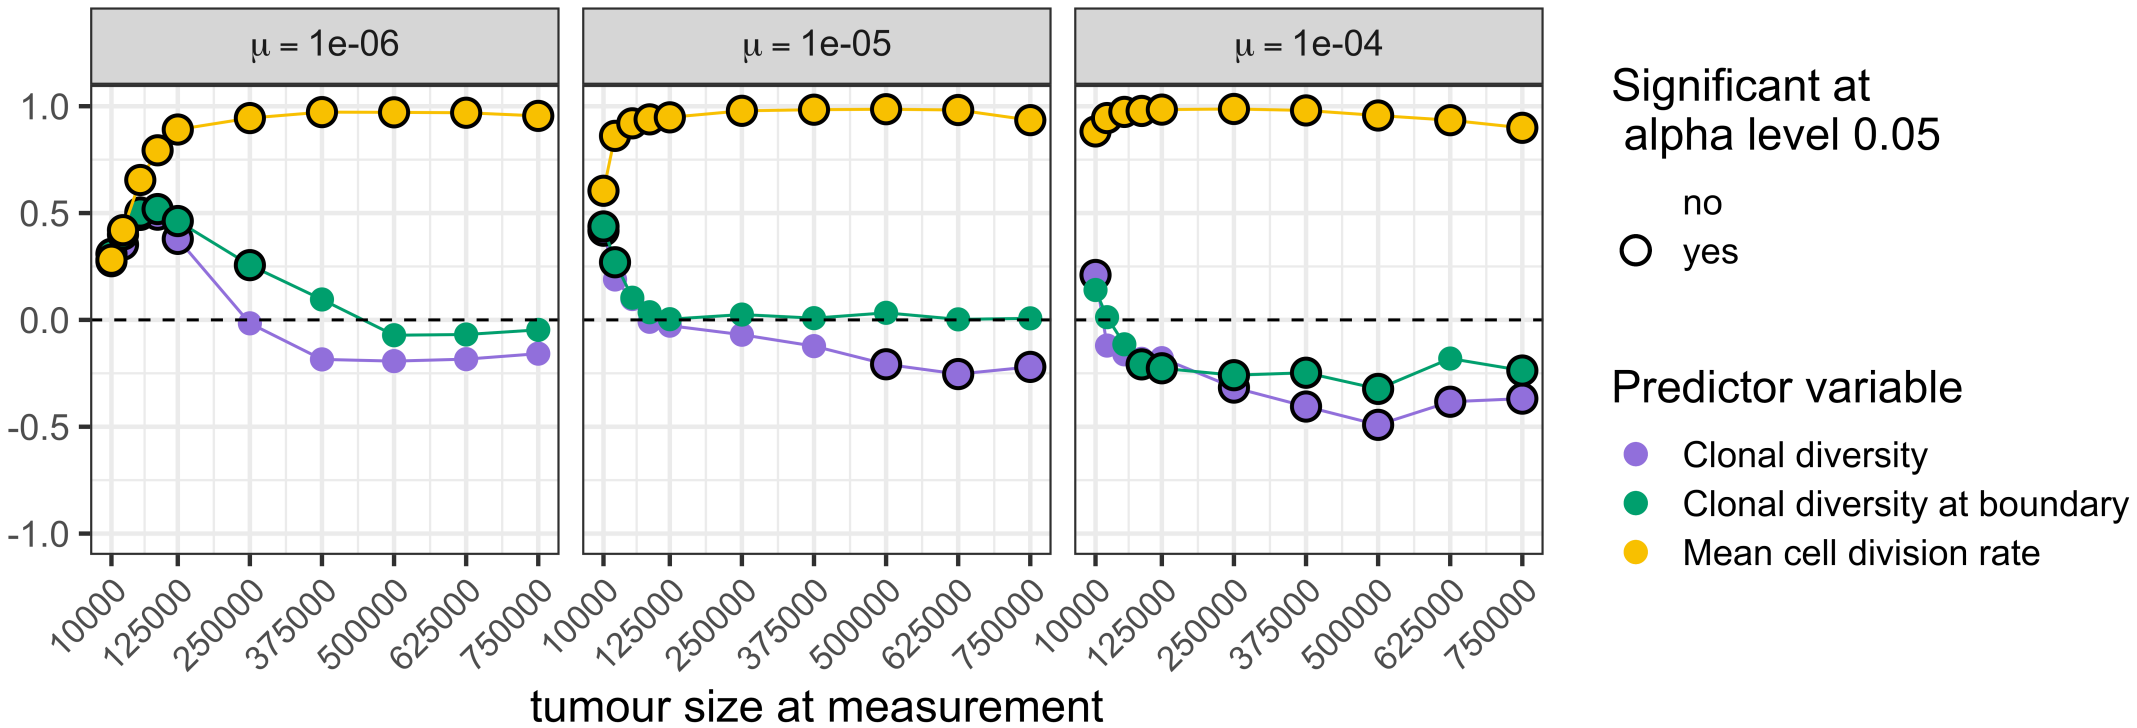

Supplement: EVA-13-1558-s005.pdf [file EVA-13-1558-s005.pdf]
