# Supplementary material for: When, why and how tumour clonal diversity predicts survival
Source: PubMed Central journal article supplement (PMC7428820; doi:10.1111/eva.13057), 2020-07-18
Supplement: EVA-13-1558-s006.pdf [file EVA-13-1558-s006.pdf]

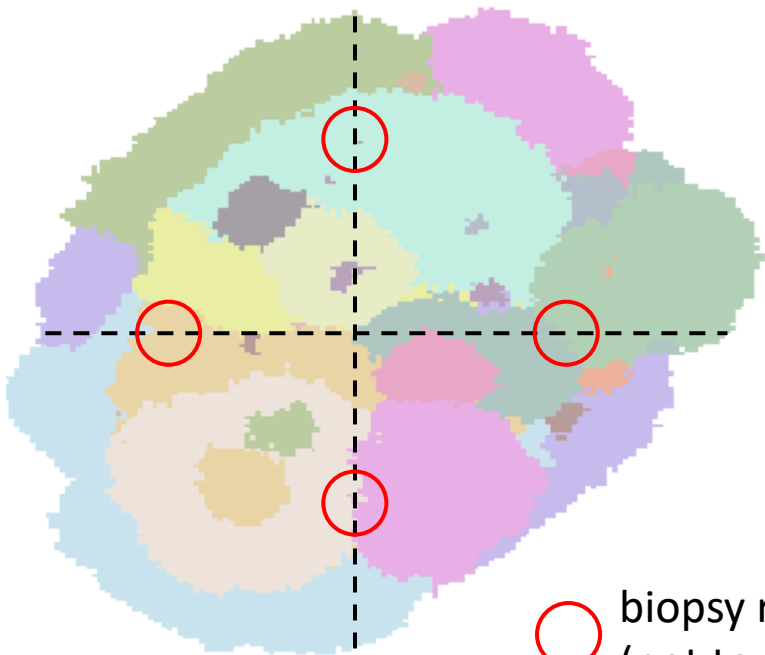

 biopsy region  
(not to scale)
