# Supplementary material for: When, why and how tumour clonal diversity predicts survival
Source: PubMed Central journal article supplement (PMC7428820; doi:10.1111/eva.13057), 2020-07-18
Supplement: EVA-13-1558-s007.pdf [file EVA-13-1558-s007.pdf]

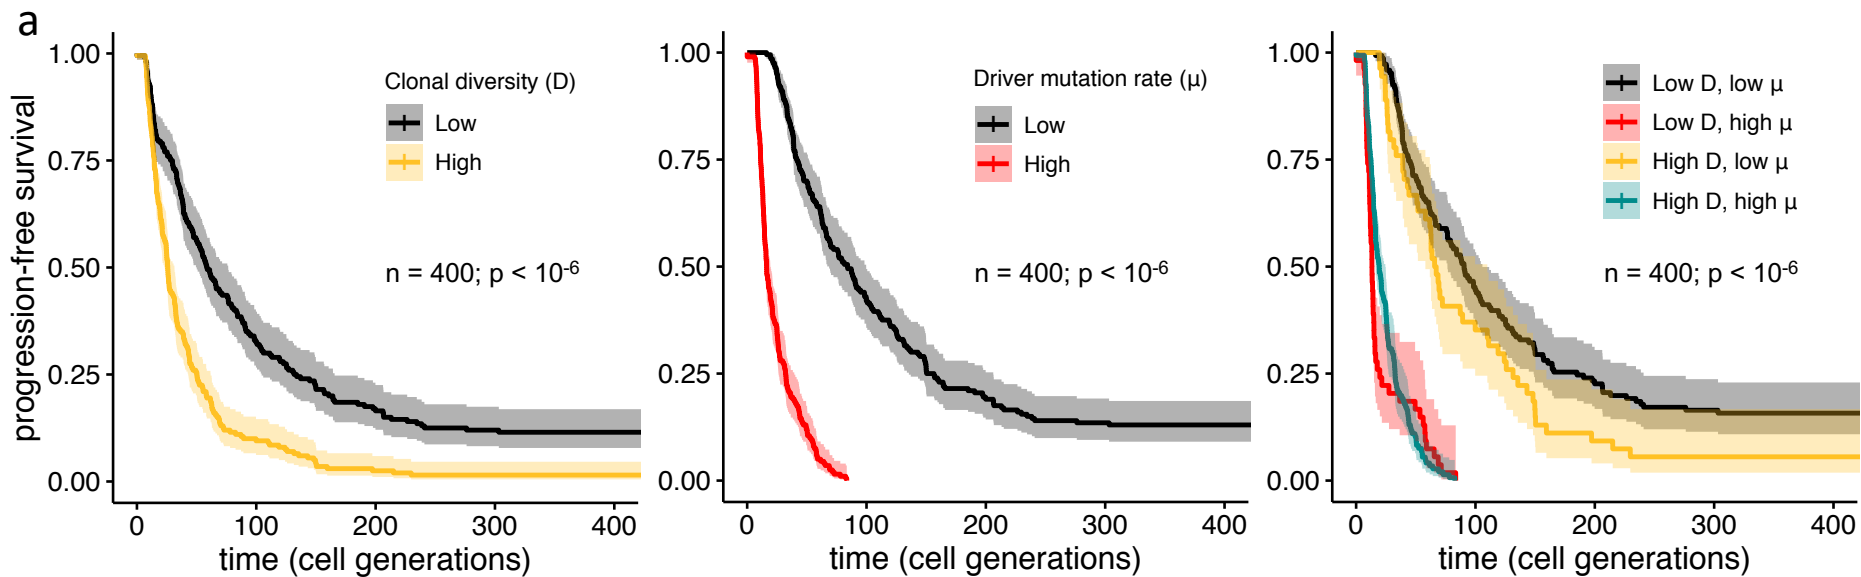

**b**

| term                                 | estimate | std. error | z     | p. value   |
|--------------------------------------|----------|------------|-------|------------|
| $\log_{10}(D)$                       | 1.66     | 0.191      | 8.66  | $<10^{-6}$ |
| term                                 | estimate | std. error | z     | p. value   |
| $\log_{10}(D)$                       | -7.78    | 1.15       | -6.76 | $<10^{-6}$ |
| $\log_{10}(D) * \log_{10}(t + 10)$   | 5.89     | 1.07       | 5.49  | $<10^{-6}$ |
| $\log_{10}(\mu)$                     | -1.82    | 0.651      | -2.8  | 0.00505    |
| $\log_{10}(\mu) * \log_{10}(t + 10)$ | 4.06     | 0.699      | 5.81  | $<10^{-6}$ |

| term                                   | estimate | std. error | z     | p. value   |
|----------------------------------------|----------|------------|-------|------------|
| $\log_{10}(D)$                         | 0.0646   | 0.235      | 0.275 | 0.783      |
| $\log_{10}(\mu)$                       | 8.58     | 1.42       | 6.05  | $<10^{-6}$ |
| $\log_{10}(\mu) * \log_{10}(t + 10)$   | -1.88    | 0.789      | -2.39 | 0.0171     |
| $\log_{10}(b - 1)$                     | 45       | 2.44       | 18.4  | $<10^{-6}$ |
| $\log_{10}(b - 1) * \log_{10}(t + 10)$ | -20.7    | 1.23       | -16.9 | $<10^{-6}$ |

Cox proportional hazards model

D = clonal diversity; t = time (cell generations); b = mean cell division rate;  $\mu$  = driver mutation rate; s = mean driver mutation effect

Green rows contain terms with significant effects ( $p < 0.05$ )
