# Supplementary material for: When, why and how tumour clonal diversity predicts survival
Source: PubMed Central journal article supplement (PMC7428820; doi:10.1111/eva.13057), 2020-07-18
Supplement: EVA-13-1558-s008.pdf [file EVA-13-1558-s008.pdf]

correlation coefficient:  
predictor variables vs  
progression-free survival

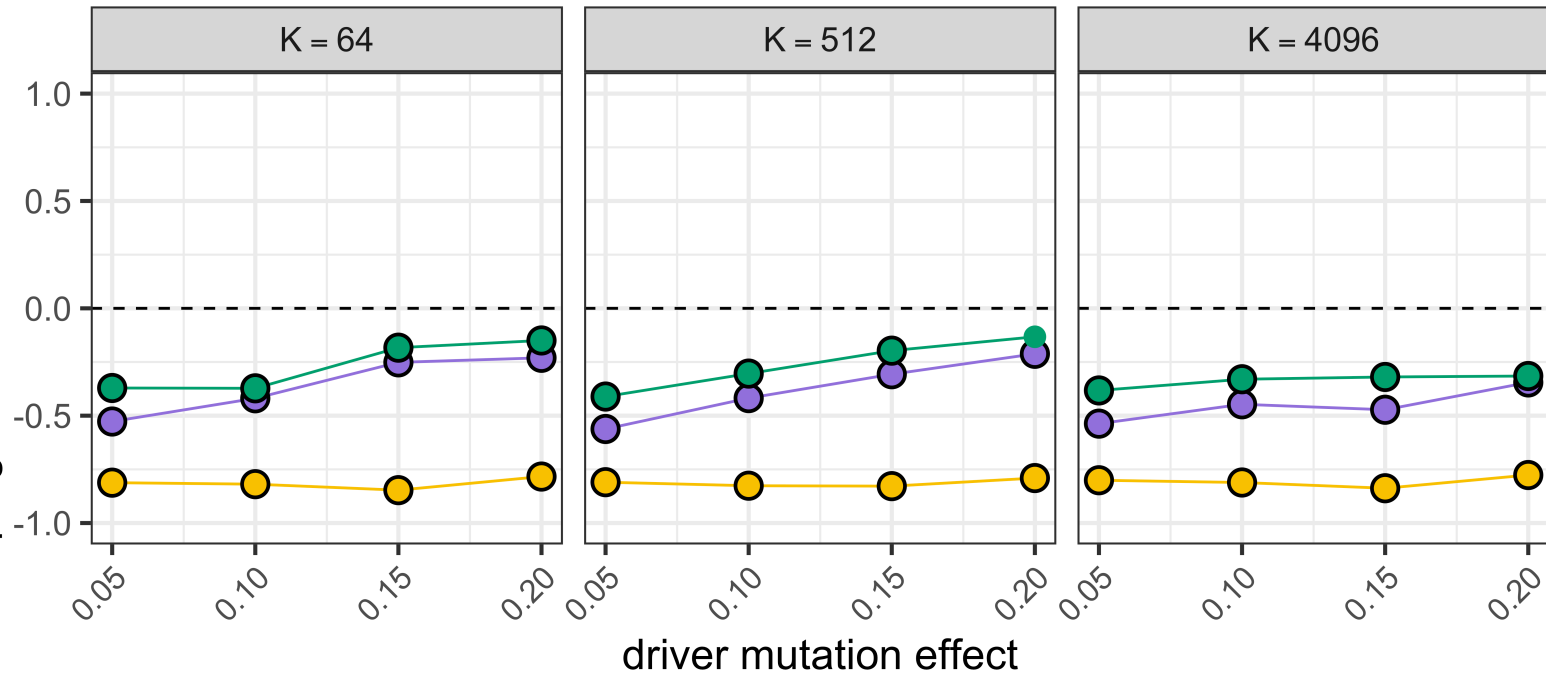

Significant at  
alpha level 0.05

no  
○ yes

Predictor variable

○ Clonal diversity  
○ Clonal diversity at boundary  
○ Mean cell division rate
